# Supplementary material for: A penta-BCP sheet with strong piezoelectricity and a record high positive Poisson's ratio
Source: Royal Society of Chemistry journal article supplement (doi:10.1039/d2tc02053j), 2022-01-01
Supplement: d2tc02053j1.pdf [file d2tc02053j1.pdf]

Supporting Information for

**Penta-BCP Sheet with Strong Piezoelectricity and a Record High Positive  
Poisson's Ratio**

Changsheng Hou,<sup>†</sup> Yiheng Shen,<sup>†</sup> Wei Sun,<sup>†</sup> Yanyan Chen,<sup>†</sup> Dongyuan Ni,<sup>†</sup> and Qian Wang<sup>\*,†</sup>

<sup>†</sup> *School of Materials Science and Engineering, CAPT, Peking University, Beijing 100871,  
China*

The coordinates and lattice parameters of the optimized geometry for penta-BCP in  
the VASP-POSCAR format.

|                    |                    |                    |                     |
|--------------------|--------------------|--------------------|---------------------|
| Penta-BCP          |                    |                    |                     |
| 1.0000000000000000 |                    |                    |                     |
| 3.7181999683000000 |                    | 0.0000000000000000 | 0.0000000000000000  |
| 0.0000000000000000 |                    | 3.6875998974000002 | 0.0000000000000000  |
| 0.0000000000000000 |                    | 0.0000000000000000 | 21.0799007415999995 |
| C                  | P                  | B                  |                     |
| 2                  | 2                  | 2                  |                     |
| Direct             |                    |                    |                     |
| 0.2275573220106466 | 0.0084910296134737 | 0.4927373522990095 |                     |
| 0.7724426610073394 | 0.5084910294782858 | 0.5072626482250584 |                     |
| 0.4615985569580090 | 0.6860329068473163 | 0.4389086878008186 |                     |
| 0.5384014259841834 | 0.1860329069810689 | 0.5610913115137066 |                     |
| 0.1207179431704049 | 0.3611560725044214 | 0.4737279732646300 |                     |
| 0.8792820398694303 | 0.8611560725754330 | 0.5262720268967769 |                     |

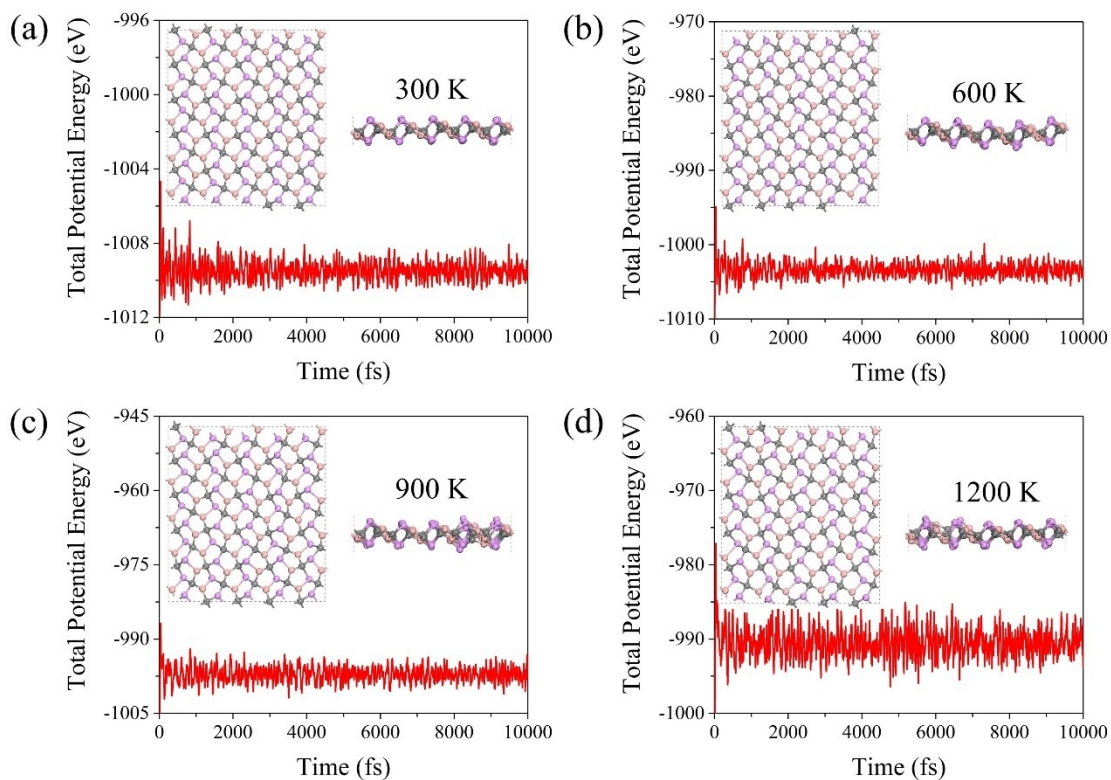

**Fig. S1.** Potential energy fluctuation with time during the AIMD simulation at (a) 300 K, (b) 600 K, (c) 900 K, and (d) 1200 K. The insets show the configuration of penta-BCP at the end of each simulation. The pink, gray, and purple spheres represent B, C, and P atoms, respectively.

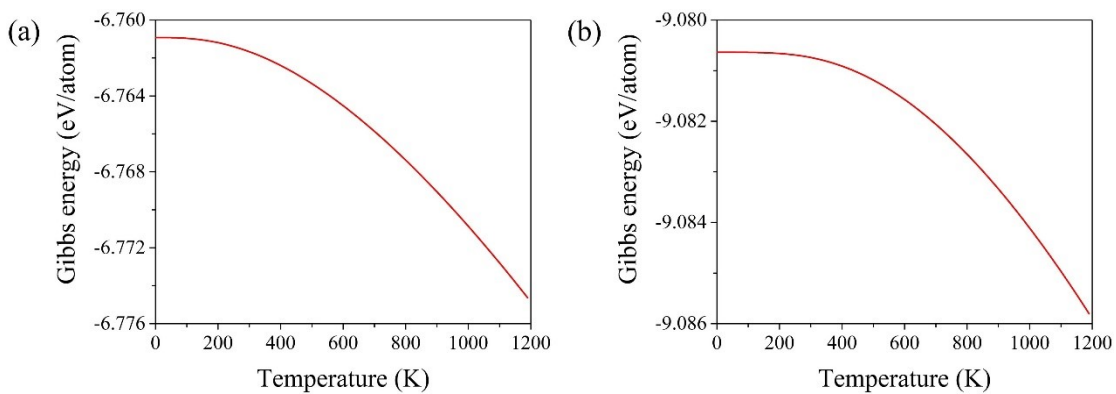

**Fig. S2.** Gibbs energy of (a) penta-BCP, and (b) diamond under different temperatures.

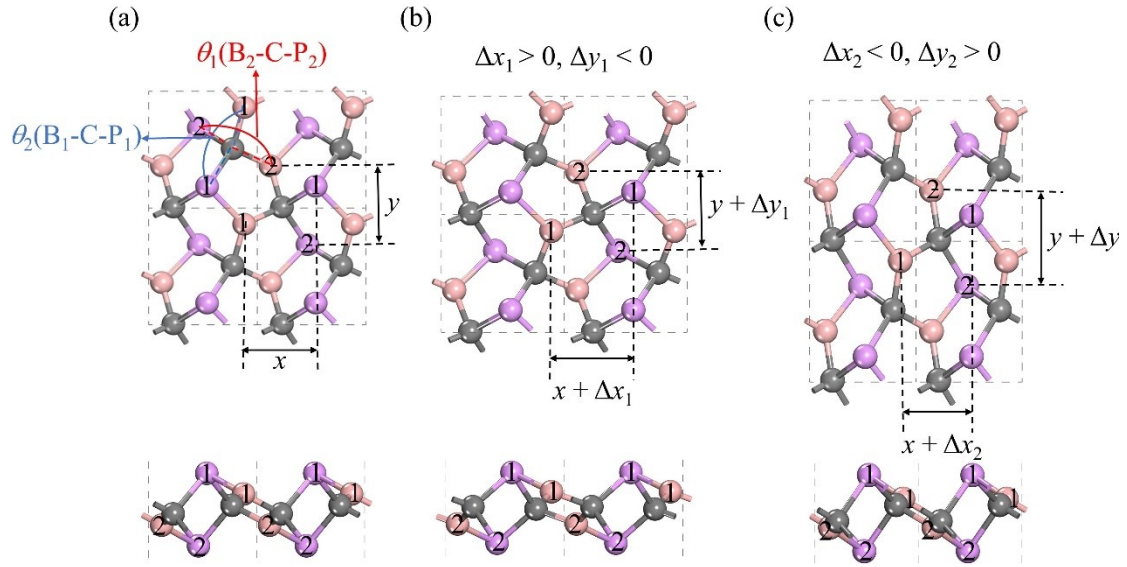

**Fig. S3.** (a) The length of the tetrahedral along the axial directions ( $x$  and  $y$ ), and the bond angles  $\theta(B_1-C-P_1)$  and  $\theta(B_2-C-P_2)$  in the equilibrium state. (b) Schematic of the changes of the length ( $\Delta x_1$  and  $\Delta y_1$ ) under tensile strain along the  $[100]$  direction, and (c) that ( $\Delta x_2$  and  $\Delta y_2$ ) along the  $[010]$  direction. The pink, gray, and purple spheres represent B, C, and P atoms, respectively.

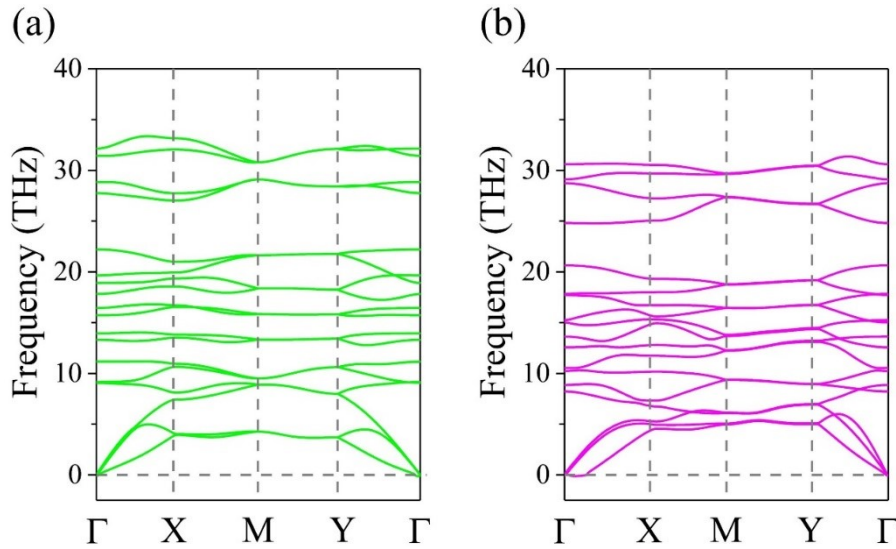

**Fig. S4.** (a, b) Phonon dispersion along the  $[100]$  and  $[010]$  direction of the penta-BCP under 10% uniaxial strain, respectively.

**Table S1** Spontaneous polarization  $P_s$  (in  $10^{-10}$  C/m) of penta-BCP with 2%, 4%, 6%, 8%, and 10% uniaxial tensile strains along the  $[100]$  or  $[010]$  directions.

| Strain (%) | [100] | [010] |
|------------|-------|-------|
| 2%         | 4.56  | 4.78  |
| 4%         | 4.47  | 4.89  |
| 6%         | 4.37  | 5.00  |
| 8%         | 4.27  | 5.08  |
| 10%        | 4.17  | 5.16  |
